# Supplementary material
Source: Springer Nature journal article supplement (https://www.springermedizin.de/resource/supplementary/12874_2010_660_MOESM3_ESM.pdf/9432356)
Supplement: MOESM3 [file 9432356]

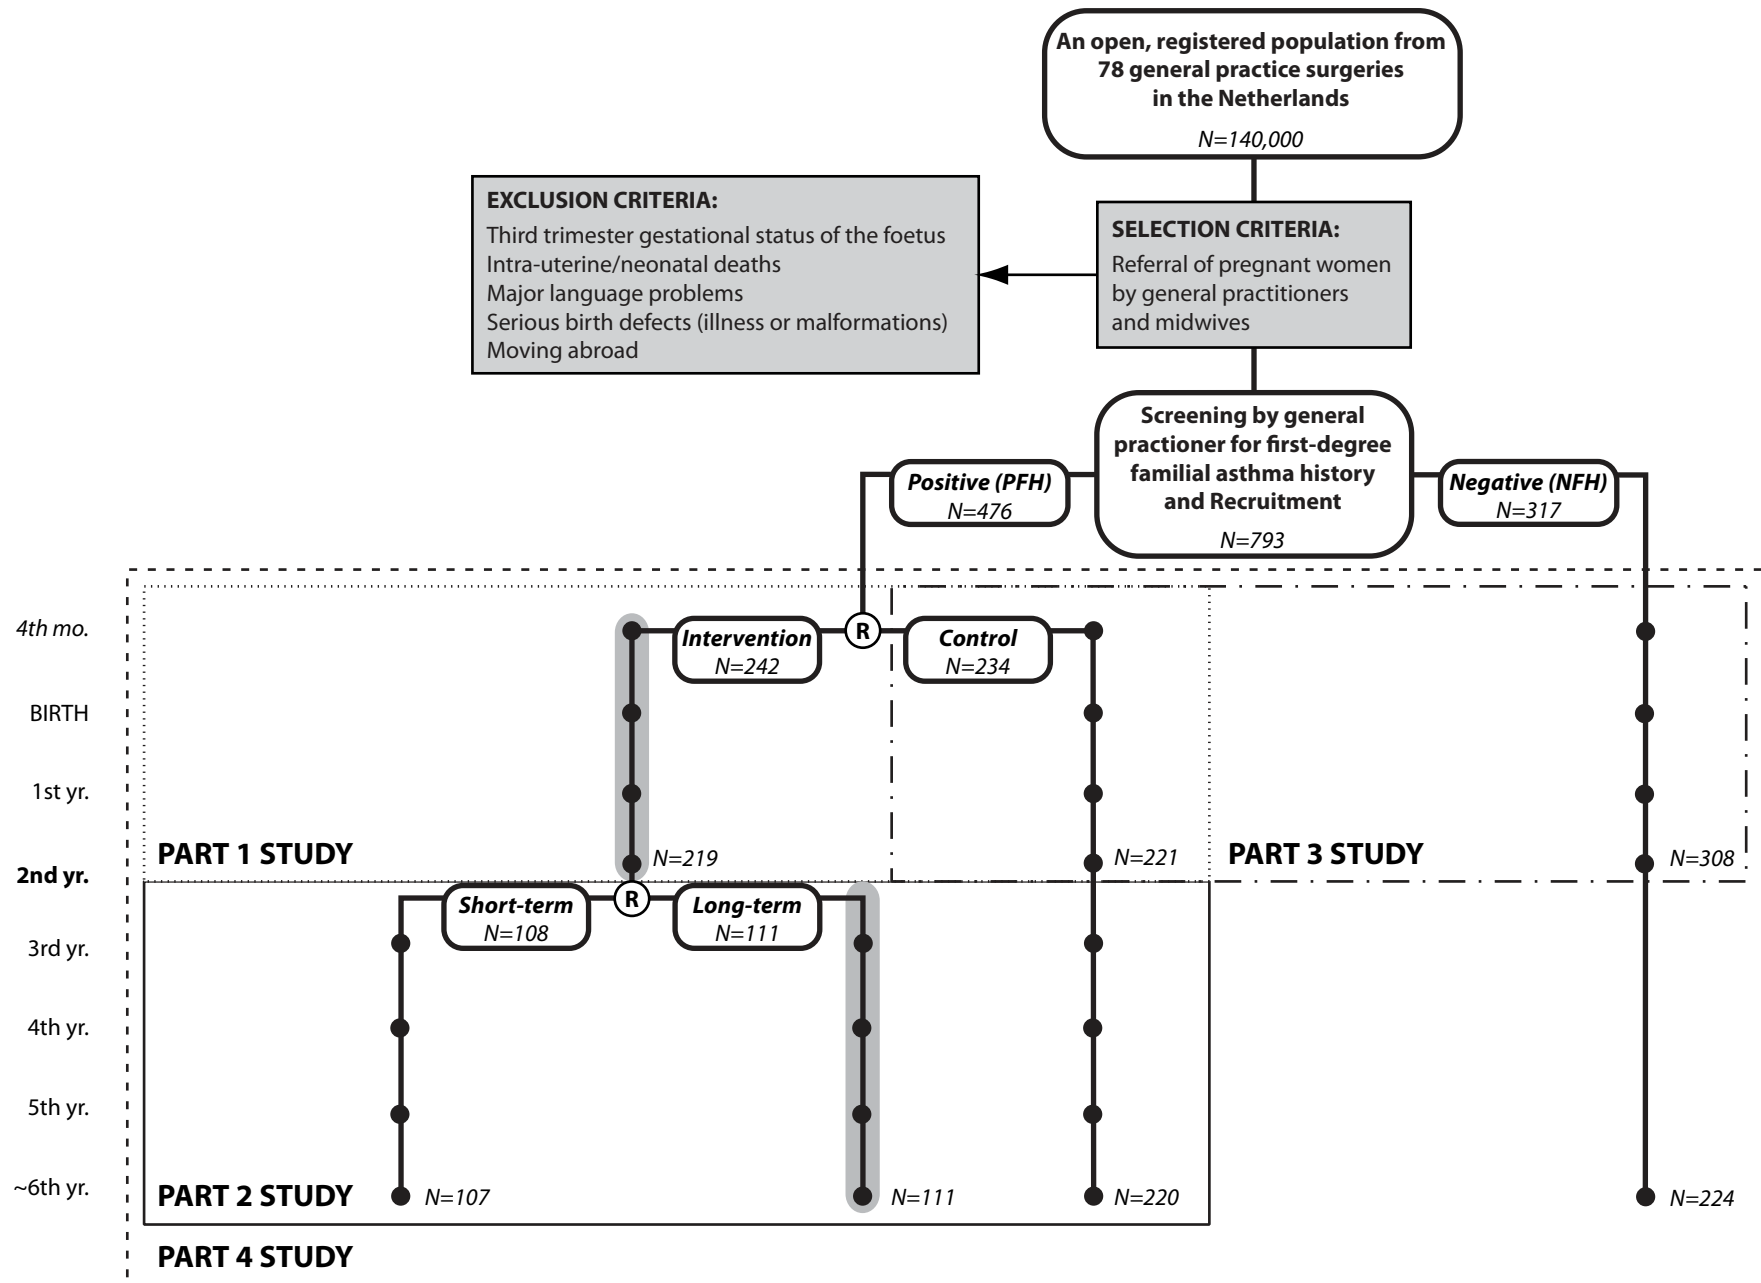

Legend: **(R)** - Randomisation    **■** - Administration of Intervention    **●** - Measurement point    PFH/NFH - Positive/Negative first-degree familial asthma history
